# Supplementary material
Source: publisher figshare collection journal article supplement (https://sage.figshare.com/ndownloader/files/17823137)
Supplement: Supplementary file 1 [file 17823137]

## Sheet: Albumin
Standards									Alb conc.	Abs			Run #1	Alb conc.	Abs		Run #2	Alb. Conc.	Abs
0	-0.01							LD1	0.023	0.005			LD1	0.71	0.583		LD1	0.985	0.814
								LD3	0.023	0.005			LD1	1.159	0.961		LD1	1.022	0.845
0.04	0.0135							LD3	0.023	0.005			LD2	0.685	0.562		LD2	1.926	1.606
0.06	0.0325							DC2	0.022	0.004			LD2	0.877	0.723		LD2	1.769	1.474
								DC2	0.023	0.005			LD3	1.469	1.221		LD3	1.686	1.404
0.09	0.062							DC3	0.021	0.003			LD3	1.773	1.477		LD3	0.722	0.593
0.1	0.073							HD1	0.022	0.004			DC1	2.633	2.201		DC1	1.608	1.338
								LD2	0.022	0.004			DC1	2.253	1.881		DC1	2.488	2.079
								HD3	0.021	0.003			DC2	1.124	0.931		DC2	0.899	0.742
													DC2	1.975	1.647		DC2	1.602	1.333
													HD1	1.673	1.393		HD1	1.351	1.122
													HD1	1.682	1.401		HD1	0.823	0.678
													HD2	1.841	1.534		HD2	0.811	0.668
													HD2	1.075	0.89		HD2	0.809	0.666
													HD3	1.386	1.152		HD3	2.128	1.776
													HD3	1.402	1.165		HD3	0.829	0.683
													Albumin Concentration Data
									1	2	3	4	5	6	7	8	9	10	11	12
								Control	2.633	2.253	1.124	1.975	1.608	2.488	0.899	1.602
								LD	0.71	1.159	0.685	0.877	1.469	1.773	0.985	1.022	1.926	1.769	1.686	0.722
								HD	1.673	1.682	1.841	1.075	1.386	1.402	1.351	0.823	0.811	0.809	2.128	0.829
										Anova: Single Factor
										SUMMARY
										Groups	Count	Sum	Average	Variance	Stnd. Dev		Groups	Average
										Control	8	14.582	1.82275	0.391967	0.626073		Control	1.82275
										LD	12	14.783	1.23192	0.217566	0.46644		LD	1.23192
										HD	12	15.81	1.3175	0.205476	0.453295		HD	1.3175
										ANOVA
										Source of Variation	SS	df	MS	F	P-value	F crit
										Between Groups	1.84605	2	0.923023	3.6186	0.0395393	3.32765
										Within Groups	7.39724	29	0.255077
										Total	9.24328	31

## Sheet: AST
Samples	Initial	Min 1	Min 2	Min 1 - I	Min 2 - 1	ΔAbs/Min
LD1	1.591	1.823	1.696	0.232	-0.127	92.82
LD2	1.653	1.529	1.563	-0.124	0.034	79.56						AST ΔAbs/Min Data
LD3	1.966	1.478	1.566	-0.488	0.088	353.6			1	2	3	4	5	6	7	8	9
DC1	2.231	1.886	1.917	-0.345	0.031	277.58		Control	277.58	298.792	154.7	38.012	88.4	58.344
DC2	2.15	1.712	1.812	-0.438	0.1	298.792		LD	92.82	79.56	353.6	268.736	40.664	51.272	105.196	76.024	8.84
HD1	1.909	1.988	1.84	0.079	-0.148	60.996		HD	60.996	101.66	48.62	175.032	156.468	232.492	93.704	177.684	99.008
HD2	1.912	1.925	2.027	0.013	0.102	101.66
HD3	1.944	2.193	1.889	0.249	-0.304	48.62
Run #2												Anova: Single Factor
Samples	Initial	Min 1	Min 2	Min 1- I	Min 2- 1	ΔAbs/Min
LD1	1.895	1.727	1.591	-0.168	-0.136	268.736						SUMMARY
LD1	1.743	1.684	1.697	-0.059	0.013	40.664			Groups	Average		Groups	Count	Sum	Average	Variance	Stnd. D
LD2	1.551	1.41	1.609	-0.141	0.199	51.272			Control	152.638		Control	6	915.828	152.638	12626.5	112.368
LD2	1.535	1.339	1.654	-0.196	0.315	105.196			LD	119.635		LD	9	1076.71	119.635	13074	114.341
LD3	1.903	1.605	1.817	-0.298	0.212	76.024			HD	127.296		HD	9	1145.66	127.296	3738.29	61.1416
LD3	1.692	1.485	1.682	-0.207	0.197	8.84
DC1	1.901	2.241	2.076	0.34	-0.165	154.7
DC1	1.754	1.797	1.711	0.043	-0.086	38.012
DC2	2.038	1.842	1.938	-0.196	0.096	88.4
DC2	1.922	1.837	1.988	-0.085	0.151	58.344
HD1	1.609	2.016	1.807	0.407	-0.209	175.032
HD1	1.894	2.045	2.071	0.151	0.026	156.468
HD2	1.712	1.944	1.975	0.232	0.031	232.492
HD2	1.887	1.841	1.993	-0.046	0.152	93.704
HD3	1.937	1.714	1.736	-0.223	0.022	177.684
HD3	1.87	1.766	1.758	-0.104	-0.008	99.008

## Sheet: Primers
Gene		CD93			Ddit4			Ccng1			Bax			CdKn1c			Adam8
Acession		nm_053383			nm_080906			nm_012923			nm_017059			nm_001033757			XM_006223556
Forward primer		GCCTGGTGATGGGCTATTT			GTGGGAGAAGGAAGTGTTGT			GGCAGCACATGCCTTTAATC			AAGGCCCTGTGCACTAAA			GACTGAGAGCAAGCGAACA			CGAGTGCTGGAGGTTGTAAA
Reverse primer		GCCTTGAGTCCGGTTGTTAT			CTTCACTACTGACCTGTTCGAG			GGGTGCCAAGAAACCATTTAC			ATCTGGAAGAAGATGGGCTG			AACGGGAGGAGAAGGAAGA			GAACACAGGGCAGATACCTTAG
		CD68			B-actin
		NM_001031638 XM_213372			AF541940
		CTTCACGGAGACACCTACAAC			GGTCAACGTCACCTACTCTAAC
		ACATGGCTGGGAACCATTAG			CTCTGTATCCTGCTCCACTTTC
Table 1. Nucleotide Sequence designed as forward and reverse primers of each specific gene.
Adam8		Forward		CGAGTGCTGGAGGTTGTAAA
		Reverse		GAACACAGGGCAGATACCTTAG
Bax		Forward		AAGGCCCTGTGCACTAAA
		Reverse		ATCTGGAAGAAGATGGGCTG
Ccng1		Forward		GGCAGCACATGCCTTTAATC
		Reverse		GGGTGCCAAGAAACCATTTAC
CD68		Forward		CTTCACGGAGACACCTACAAC
		Reverse		ACATGGCTGGGAACCATTAG
CD93		Forward		GCCTGGTGATGGGCTATTT
		Reverse		GCCTTGAGTCCGGTTGTTAT
Cdknc1		Forward		GACTGAGAGCAAGCGAACA
		Reverse		AACGGGAGGAGAAGGAAGA
Ddit4		Forward		GTGGGAGAAGGAAGTGTTGT
		Reverse		CTTCACTACTGACCTGTTCGAG
B-actin		Forward		GGTCAACGTCACCTACTCTAAC
		Reverse		CTCTGTATCCTGCTCCACTTTC
